# Supplementary material for: Building a genomic framework for prospective MRSA surveillance in the United Kingdom and the Republic of Ireland
Source: PubMed Central journal article supplement (PMC4728378; doi:10.1101/gr.196709.115), 2016-02
Supplement: supp_gr.196709.115_Supplemental_Table_S1.pdf [file supp_gr.196709.115_Supplemental_Table_S1.pdf]

**Table S1. Number of MRSA isolates in each region per year**

| Target collection (ANY <i>S. aureus</i> )     | 10 <i>S. aureus</i> | 10 <i>S. aureus</i> | 10 <i>S. aureus</i> | 10 <i>S. aureus</i> | 10 <i>S. aureus</i> | 10 <i>S. aureus</i> | 10 <i>S. aureus</i> | 20 <i>S. aureus</i> | 20 <i>S. aureus</i> | 14 <i>S. aureus</i> |                                          |
|-----------------------------------------------|---------------------|---------------------|---------------------|---------------------|---------------------|---------------------|---------------------|---------------------|---------------------|---------------------|------------------------------------------|
| Year                                          | 2001                | 2002                | 2003                | 2004                | 2005                | 2006                | 2007                | 2008                | 2009                | 2010                | total number of MRSA isolates per region |
| <b>ENGLAND</b>                                |                     |                     |                     |                     |                     |                     |                     |                     |                     |                     |                                          |
| Central-East Midlands                         | 4 (1)               | 3 (1)               | 0 (1)               | 7 (1)               | 3 (1)               | 3 (1)               | 3 (1)               | 5 (1)               | 2 (1)               | 3 (1)               | <b>33</b>                                |
| East 1                                        | 10 (2)              | 3 (1)               | 1 (1)               | 4 (1)               | 1 (1)               | 5 (1)               | 3 (1)               | 5 (1)               | - (0)               | 8 (2)               | <b>40</b>                                |
| East 2                                        | 5 (1)               | 12 (2)              | 9 (2)               | 12 (2)              | 9 (2)               | 9 (2)               | 6 (2)               | 7 (2)*              | 8 (2)*              | 2 (2)               | <b>79</b>                                |
| North-Central                                 | 4 (1)               | 9 (2)               | 7 (2)               | 9 (2)               | 8 (2)               | 11 (2)              | 6 (2)               | 9 (2)               | 10 (2)              | 4 (2)*              | <b>77</b>                                |
| North-East 1                                  | 3 (1)               | 2 (1)               | 3 (1)               | 5 (1)               | 4 (1)               | 4 (1)               | 1 (1)               | 4 (1)               | 4 (1)               | 0 (1)*              | <b>30</b>                                |
| North-East 2                                  | - (0)               | - (0)               | - (0)               | - (0)               | - (0)               | - (0)               | - (0)               | - (0)               | - (0)               | 3 (1)               | <b>3</b>                                 |
| North-West 1                                  | 4 (1)               | 6 (1)               | 4 (1)               | 6 (1)               | 2 (1)               | 1 (1)               | 7 (1)               | 6 (1)               | 4 (1)               | 3 (2)               | <b>43</b>                                |
| North-West 2                                  | 4 (1)               | 2 (1)               | 4 (1)               | 1 (1)               | 3 (1)               | 0 (1)*              | 6 (1)               | 4 (1)               | 9 (1)               | 1 (1)               | <b>34</b>                                |
| South-Central                                 | 7 (1)               | 4 (1)               | 5 (1)               | 2 (1)               | 3 (1)               | 8 (1)               | 4 (1)               | 4 (1)               | 4 (1)               | 2 (1)               | <b>43</b>                                |
| South-East                                    | 7 (2)               | 9 (2)               | 10 (2)              | 10 (2)              | 11 (2)              | 8 (2)*              | 8 (2)               | 8 (2)*              | 7 (3)               | 9 (4)               | <b>87</b>                                |
| South-West                                    | 10 (2)              | 5 (2)               | 8 (2)               | 8 (2)               | 10 (2)              | 9 (2)               | 8 (2)               | 15 (2)              | 7 (2)               | 6 (4)**             | <b>86</b>                                |
| West Midlands                                 | 11 (3)              | 13 (3)              | 16 (3)              | 15 (3)              | 11 (3)              | 12 (3)              | 8 (3)               | 8 (3)               | 7 (3)*              | 2 (3)               | <b>103</b>                               |
| <b>NORTHERN IRELAND</b>                       | 4 (2)               | 5 (2)               | 9 (2)               | 9 (2)               | 6 (2)               | 9 (2)               | 7 (2)               | 3 (1)               | 11 (2)              | 9 (3)               | <b>72</b>                                |
| <b>SCOTLAND</b>                               | 10 (2)              | 5 (2)               | 7 (2)*              | 9 (2)               | 8 (2)               | 9 (2)               | 5 (2)               | 10 (2)              | 11 (2)              | 16 (4)*             | <b>90</b>                                |
| <b>WALES</b>                                  | 11 (2)              | 10 (2)              | 9 (2)               | 11 (2)              | 6 (2)               | 9 (2)               | 11 (2)              | 15 (2)              | 13 (2)              | 14 (3)              | <b>109</b>                               |
| <b>IRELAND</b>                                | 9 (2)               | 3 (2)               | 3 (2)               | 9 (2)               | 4 (2)               | 11 (2)              | 7 (2)               | 15 (2)              | 10 (2)              | 13 (4)              | <b>84</b>                                |
| <b>total number of MRSA isolates per year</b> | <b>103 (24)</b>     | <b>91 (25)</b>      | <b>95 (25)</b>      | <b>117 (25)</b>     | <b>89 (25)</b>      | <b>108 (25)</b>     | <b>90 (25)</b>      | <b>118 (24)</b>     | <b>107 (25)</b>     | <b>95 (38)</b>      | <b>1013</b>                              |

Numbers in brackets indicate the number of laboratories contributing any *S. aureus*. \* indicates that one lab has contributed less than 90% of target samples; \*\* indicates two labs have contributed less than 90% of target samples
