# Supplementary material for: Building a genomic framework for prospective MRSA surveillance in the United Kingdom and the Republic of Ireland
Source: Genome Res. 2016 Feb;26(2):263–70. doi: 10.1101/gr.196709.115 (PMC4728378; doi:10.1101/gr.196709.115)
Supplement: Supplemental Material [file supp_gr.196709.115_Supplemental_Table_S2.xlsx]

## Sheet: Sheet1
ENA_accession	BSAC strain id	ST	CC	Year of isolation	Country	referral network name
ERR107785	BSAC_st10	22	CC22	2001	Northern Ireland	Northern Ireland
ERR107794	BSAC_st36	36	CC30	2001	England	West Midlands
ERR107795	BSAC_st38	22	CC22	2001	England	West Midlands
ERR107796	BSAC_st39	22	CC22	2001	England	West Midlands
ERR107797	BSAC_st40	22	CC22	2001	England	West Midlands
ERR107798	BSAC_st41	22	CC22	2001	Wales	Wales
ERR107799	BSAC_st44	22	CC22	2001	Wales	Wales
ERR107800	BSAC_st45	5	CC5	2001	Wales	Wales
ERR107801	BSAC_st48	5	CC5	2001	Wales	Wales
ERR107802	BSAC_st51	8	CC8	2001	Northern Ireland	Northern Ireland
ERR107803	BSAC_st56	8	CC8	2001	Northern Ireland	Northern Ireland
ERR107786	BSAC_st11	22	CC22	2001	Ireland	Ireland
ERR107804	BSAC_st57	22	CC22	2001	Northern Ireland	Northern Ireland
ERR107805	BSAC_st62	22	CC22	2001	Wales	Wales
ERR107806	BSAC_st63	22	CC22	2001	Wales	Wales
ERR107807	BSAC_st65	22	CC22	2001	Wales	Wales
ERR107808	BSAC_st67	22	CC22	2001	Wales	Wales
ERR107809	BSAC_st68	22	CC22	2001	Wales	Wales
ERR107810	BSAC_st69	22	CC22	2001	Wales	Wales
ERR107811	BSAC_st70	22	CC22	2001	Wales	Wales
ERR107812	BSAC_st72	22	CC22	2001	England	South-West
ERR107813	BSAC_st75	22	CC22	2001	England	South-West
ERR107787	BSAC_st12	22	CC22	2001	Ireland	Ireland
ERR107814	BSAC_st76	36	CC30	2001	England	South-West
ERR107815	BSAC_st77	22	CC22	2001	England	South-West
ERR107816	BSAC_st78	22	CC22	2001	England	South-West
ERR107817	BSAC_st81	22	CC22	2001	England	East 1
ERR107818	BSAC_st83	22	CC22	2001	England	East 1
ERR107819	BSAC_st85	22	CC22	2001	England	East 1
ERR107820	BSAC_st86	22	CC22	2001	England	East 1
ERR107821	BSAC_st87	22	CC22	2001	England	East 1
ERR107822	BSAC_st88	22	CC22	2001	England	East 1
ERR107823	BSAC_st89	22	CC22	2001	England	East 1
ERR107788	BSAC_st16	8	CC8	2001	Ireland	Ireland
ERR107824	BSAC_st93	22	CC22	2001	England	North-West 1
ERR107825	BSAC_st94	22	CC22	2001	England	North-West 1
ERR107826	BSAC_st95	22	CC22	2001	England	North-West 1
ERR107827	BSAC_st97	22	CC22	2001	England	North-West 1
ERR107828	BSAC_st101	22	CC22	2001	Ireland	Ireland
ERR107831	BSAC_st345	36	CC30	2002	England	North-West 1
ERR107832	BSAC_st346	22	CC22	2002	England	North-West 1
ERR107833	BSAC_st349	22	CC22	2002	England	North-West 1
ERR107789	BSAC_st23	8	CC8	2001	England	South-East
ERR107834	BSAC_st350	22	CC22	2002	England	North-West 1
ERR107835	BSAC_st363	22	CC22	2002	England	West Midlands
ERR107836	BSAC_st364	22	CC22	2002	England	West Midlands
ERR107837	BSAC_st372	36	CC30	2002	England	North-Central
ERR107838	BSAC_st376	59	CC59	2002	England	North-Central
ERR107839	BSAC_st378	2892	CC22	2002	England	North-Central
ERR107840	BSAC_st390	22	CC22	2002	Scotland	Scotland
ERR107841	BSAC_st397	22	CC22	2002	England	North-West 2
ERR107842	BSAC_st399	22	CC22	2002	England	North-West 2
ERR107843	BSAC_st401	22	CC22	2002	England	North-Central
ERR107790	BSAC_st24	36	CC30	2001	England	South-East
ERR107844	BSAC_st402	22	CC22	2002	England	North-Central
ERR107845	BSAC_st403	22	CC22	2002	England	North-Central
ERR107846	BSAC_st407	22	CC22	2002	England	North-Central
ERR107847	BSAC_st408	36	CC30	2002	England	North-Central
ERR107848	BSAC_st410	22	CC22	2002	England	North-Central
ERR107849	BSAC_st411	36	CC30	2002	Scotland	Scotland
ERR107850	BSAC_st413	22	CC22	2002	Scotland	Scotland
ERR107851	BSAC_st418	22	CC22	2002	Scotland	Scotland
ERR107852	BSAC_st420	22	CC22	2002	Scotland	Scotland
ERR107853	BSAC_st423	22	CC22	2002	England	East 2
ERR107791	BSAC_st27	241	CC8	2001	England	South-East
ERR107854	BSAC_st425	22	CC22	2002	England	East 2
ERR107855	BSAC_st426	22	CC22	2002	England	East 2
ERR107856	BSAC_st427	22	CC22	2002	England	East 2
ERR107857	BSAC_st428	36	CC30	2002	England	East 2
ERR107858	BSAC_st430	22	CC22	2002	England	East 2
ERR107859	BSAC_st432	22	CC22	2002	England	Central- East Midlands
ERR107860	BSAC_st436	2032	CC45	2002	England	Central- East Midlands
ERR107861	BSAC_st442	22	CC22	2002	England	North-East 1
ERR107862	BSAC_st443	22	CC22	2002	England	North-East 1
ERR107863	BSAC_st453	36	CC30	2002	England	West Midlands
ERR107792	BSAC_st28	22	CC22	2001	England	South-East
ERR107864	BSAC_st454	22	CC22	2002	England	West Midlands
ERR107865	BSAC_st456	22	CC22	2002	England	West Midlands
ERR107866	BSAC_st462	22	CC22	2002	England	South-Central
ERR107867	BSAC_st463	22	CC22	2002	England	South-Central
ERR107868	BSAC_st469	22	CC22	2002	England	South-Central
ERR107869	BSAC_st470	22	CC22	2002	England	South-Central
ERR107870	BSAC_st474	36	CC30	2002	England	South-East
ERR107871	BSAC_st475	22	CC22	2002	England	South-East
ERR107872	BSAC_st478	22	CC22	2002	England	South-East
ERR107873	BSAC_st479	22	CC22	2002	England	South-East
ERR107793	BSAC_st30	22	CC22	2001	England	South-East
ERR107874	BSAC_st489	36	CC30	2002	England	South-West
ERR107875	BSAC_st490	2935	CC22	2002	England	South-West
ERR107876	BSAC_st494	36	CC30	2002	England	East 1
ERR107877	BSAC_st495	36	CC30	2002	England	East 1
ERR107881	BSAC_st501	22	CC22	2003	Northern Ireland	Northern Ireland
ERR107890	BSAC_st522	22	CC22	2003	Wales	Wales
ERR107891	BSAC_st525	22	CC22	2003	Wales	Wales
ERR107892	BSAC_st527	5	CC5	2003	Wales	Wales
ERR107893	BSAC_st528	22	CC22	2003	Wales	Wales
ERR107894	BSAC_st530	22	CC22	2003	Wales	Wales
ERR107895	BSAC_st533	22	CC22	2003	Ireland	Ireland
ERR107896	BSAC_st535	22	CC22	2003	Ireland	Ireland
ERR107897	BSAC_st543	22	CC22	2003	Northern Ireland	Northern Ireland
ERR107898	BSAC_st544	22	CC22	2003	Northern Ireland	Northern Ireland
ERR107899	BSAC_st550	8	CC8	2003	Northern Ireland	Northern Ireland
ERR107882	BSAC_st502	8	CC8	2003	Northern Ireland	Northern Ireland
ERR107900	BSAC_st551	22	CC22	2003	England	West Midlands
ERR107901	BSAC_st554	36	CC30	2003	England	West Midlands
ERR107902	BSAC_st555	22	CC22	2003	England	West Midlands
ERR107903	BSAC_st556	36	CC30	2003	England	West Midlands
ERR107904	BSAC_st557	36	CC30	2003	England	West Midlands
ERR107905	BSAC_st564	36	CC30	2003	England	South-West
ERR107906	BSAC_st565	36	CC30	2003	England	South-West
ERR107907	BSAC_st567	22	CC22	2003	England	South-West
ERR107908	BSAC_st569	36	CC30	2003	England	South-West
ERR107909	BSAC_st571	22	CC22	2003	England	East 2
ERR107883	BSAC_st504	22	CC22	2003	Northern Ireland	Northern Ireland
ERR107910	BSAC_st572	22	CC22	2003	England	East 2
ERR107911	BSAC_st574	36	CC30	2003	England	East 2
ERR107912	BSAC_st575	2914	CC22	2003	England	East 2
ERR107913	BSAC_st580	22	CC22	2003	England	East 2
ERR107914	BSAC_st584	22	CC22	2003	Wales	Wales
ERR107915	BSAC_st585	22	CC22	2003	Wales	Wales
ERR107916	BSAC_st592	22	CC22	2003	England	North-West 1
ERR107917	BSAC_st593	22	CC22	2003	England	North-West 1
ERR107918	BSAC_st594	36	CC30	2003	England	North-West 1
ERR107919	BSAC_st598	22	CC22	2003	England	North-West 1
ERR107884	BSAC_st506	22	CC22	2003	Northern Ireland	Northern Ireland
ERR107920	BSAC_st612	36	CC30	2003	England	West Midlands
ERR107921	BSAC_st614	22	CC22	2003	England	West Midlands
ERR107922	BSAC_st617	22	CC22	2003	England	West Midlands
ERR107923	BSAC_st621	22	CC22	2003	Scotland	Scotland
ERR107924	BSAC_st624	22	CC22	2003	Scotland	Scotland
ERR107927	BSAC_st631	22	CC22	2003	England	North-Central
ERR107928	BSAC_st866	22	CC22	2004	England	West Midlands
ERR107929	BSAC_st873	36	CC30	2004	Scotland	Scotland
ERR107885	BSAC_st509	8	CC8	2003	Northern Ireland	Northern Ireland
ERR107930	BSAC_st875	22	CC22	2004	Scotland	Scotland
ERR107931	BSAC_st876	22	CC22	2004	Scotland	Scotland
ERR107932	BSAC_st877	22	CC22	2004	Scotland	Scotland
ERR107933	BSAC_st880	22	CC22	2004	Scotland	Scotland
ERR107934	BSAC_st882	22	CC22	2004	England	North-Central
ERR107935	BSAC_st886	36	CC30	2004	England	North-Central
ERR107936	BSAC_st888	22	CC22	2004	England	North-Central
ERR107937	BSAC_st892	22	CC22	2004	Scotland	Scotland
ERR107938	BSAC_st893	22	CC22	2004	Scotland	Scotland
ERR107939	BSAC_st894	22	CC22	2004	Scotland	Scotland
ERR107886	BSAC_st512	36	CC30	2003	England	South-East
ERR107940	BSAC_st899	36	CC30	2004	Scotland	Scotland
ERR107941	BSAC_st902	22	CC22	2004	England	Central- East Midlands
ERR107942	BSAC_st903	22	CC22	2004	England	Central- East Midlands
ERR107943	BSAC_st904	22	CC22	2004	England	Central- East Midlands
ERR107944	BSAC_st907	22	CC22	2004	England	Central- East Midlands
ERR107945	BSAC_st908	22	CC22	2004	England	Central- East Midlands
ERR107946	BSAC_st909	22	CC22	2004	England	Central- East Midlands
ERR107947	BSAC_st910	22	CC22	2004	England	Central- East Midlands
ERR107948	BSAC_st911	22	CC22	2004	England	North-West 2
ERR107949	BSAC_st921	22	CC22	2004	England	North-East 1
ERR107887	BSAC_st515	36	CC30	2003	England	South-East
ERR107950	BSAC_st924	22	CC22	2004	England	North-East 1
ERR107951	BSAC_st925	22	CC22	2004	England	North-East 1
ERR107952	BSAC_st927	22	CC22	2004	England	North-East 1
ERR107953	BSAC_st930	22	CC22	2004	England	North-East 1
ERR107954	BSAC_st931	22	CC22	2004	England	West Midlands
ERR107955	BSAC_st932	22	CC22	2004	England	West Midlands
ERR107956	BSAC_st933	22	CC22	2004	England	West Midlands
ERR107957	BSAC_st935	22	CC22	2004	England	West Midlands
ERR107958	BSAC_st937	22	CC22	2004	England	West Midlands
ERR107959	BSAC_st939	22	CC22	2004	England	West Midlands
ERR107888	BSAC_st516	22	CC22	2003	England	South-East
ERR107960	BSAC_st940	22	CC22	2004	England	West Midlands
ERR107961	BSAC_st942	22	CC22	2004	England	South-Central
ERR107962	BSAC_st945	22	CC22	2004	England	South-Central
ERR107963	BSAC_st952	22	CC22	2004	England	South-East
ERR107964	BSAC_st953	22	CC22	2004	England	South-East
ERR107965	BSAC_st955	22	CC22	2004	England	South-East
ERR107966	BSAC_st960	22	CC22	2004	England	South-East
ERR107967	BSAC_st961	22	CC22	2004	England	North-Central
ERR107968	BSAC_st963	36	CC30	2004	England	North-Central
ERR107969	BSAC_st964	22	CC22	2004	England	North-Central
ERR107889	BSAC_st519	22	CC22	2003	England	South-East
ERR107970	BSAC_st966	22	CC22	2004	England	North-Central
ERR107971	BSAC_st970	5	CC5	2004	England	North-Central
ERR107972	BSAC_st972	22	CC22	2004	England	South-West
ERR107973	BSAC_st973	36	CC30	2004	England	South-West
ERR107974	BSAC_st975	36	CC30	2004	England	South-West
ERR111037	BSAC_st1742	22	CC22	2007	England	East 2
ERR111046	BSAC_st1792	5	CC5	2008	Wales	Wales
ERR111047	BSAC_st1793	22	CC22	2008	Wales	Wales
ERR111048	BSAC_st1797	22	CC22	2008	Wales	Wales
ERR111049	BSAC_st1798	22	CC22	2008	Wales	Wales
ERR111050	BSAC_st1799	22	CC22	2008	Wales	Wales
ERR111051	BSAC_st1800	22	CC22	2008	Wales	Wales
ERR111052	BSAC_st1803	22	CC22	2008	Wales	Wales
ERR111053	BSAC_st1804	22	CC22	2008	Wales	Wales
ERR111054	BSAC_st1816	22	CC22	2008	Ireland	Ireland
ERR111055	BSAC_st1817	22	CC22	2008	Ireland	Ireland
ERR111038	BSAC_st1745	22	CC22	2007	England	East 2
ERR111056	BSAC_st1818	22	CC22	2008	Ireland	Ireland
ERR111057	BSAC_st1820	22	CC22	2008	Ireland	Ireland
ERR111058	BSAC_st1823	5	CC5	2008	Ireland	Ireland
ERR111059	BSAC_st1824	22	CC22	2008	Ireland	Ireland
ERR111060	BSAC_st1825	22	CC22	2008	Ireland	Ireland
ERR111061	BSAC_st1827	5	CC5	2008	Ireland	Ireland
ERR111062	BSAC_st1829	22	CC22	2008	Ireland	Ireland
ERR111063	BSAC_st1831	8	CC8	2008	Northern Ireland	Northern Ireland
ERR111064	BSAC_st1836	22	CC22	2008	Northern Ireland	Northern Ireland
ERR111065	BSAC_st1846	22	CC22	2008	Northern Ireland	Northern Ireland
ERR111039	BSAC_st1748	22	CC22	2007	England	East 2
ERR111066	BSAC_st1857	22	CC22	2008	England	West Midlands
ERR111067	BSAC_st1878	36	CC30	2008	England	South-West
ERR111068	BSAC_st1881	1	CC1	2008	England	South-West
ERR111069	BSAC_st1891	22	CC22	2008	England	East 2
ERR111070	BSAC_st1898	22	CC22	2008	England	East 2
ERR111071	BSAC_st1899	22	CC22	2008	England	East 2
ERR111072	BSAC_st1903	22	CC22	2008	England	East 2
ERR111073	BSAC_st1906	22	CC22	2008	England	East 2
ERR111075	BSAC_st1912	22	CC22	2008	Wales	Wales
ERR111040	BSAC_st1750	22	CC22	2007	England	East 2
ERR111076	BSAC_st1913	22	CC22	2008	Wales	Wales
ERR111077	BSAC_st1921	22	CC22	2008	Wales	Wales
ERR111078	BSAC_st1924	22	CC22	2008	Wales	Wales
ERR111079	BSAC_st1925	22	CC22	2008	Wales	Wales
ERR111080	BSAC_st1927	22	CC22	2008	Wales	Wales
ERR111083	BSAC_st1932	22	CC22	2008	England	North-West 1
ERR111084	BSAC_st1934	22	CC22	2008	England	North-West 1
ERR111085	BSAC_st1936	22	CC22	2008	England	North-West 1
ERR111041	BSAC_st1775	22	CC22	2008	England	South-East
ERR111086	BSAC_st1941	22	CC22	2008	England	North-West 1
ERR111087	BSAC_st1942	22	CC22	2008	England	North-West 1
ERR111088	BSAC_st1951	22	CC22	2008	Ireland	Ireland
ERR111089	BSAC_st1956	22	CC22	2008	Ireland	Ireland
ERR111090	BSAC_st1961	22	CC22	2008	Ireland	Ireland
ERR111091	BSAC_st1965	22	CC22	2008	Ireland	Ireland
ERR111092	BSAC_st1966	22	CC22	2008	Ireland	Ireland
ERR111093	BSAC_st1971	22	CC22	2008	England	West Midlands
ERR111094	BSAC_st1988	22	CC22	2008	England	West Midlands
ERR111095	BSAC_st1989	2900	CC22	2008	England	West Midlands
ERR111042	BSAC_st1777	36	CC30	2008	England	South-East
ERR111096	BSAC_st1991	36	CC30	2008	Scotland	Scotland
ERR111097	BSAC_st1993	22	CC22	2008	Scotland	Scotland
ERR111098	BSAC_st1998	36	CC30	2008	Scotland	Scotland
ERR111099	BSAC_st2002	36	CC30	2008	Scotland	Scotland
ERR111100	BSAC_st2003	22	CC22	2008	Scotland	Scotland
ERR111101	BSAC_st2007	36	CC30	2008	Scotland	Scotland
ERR111102	BSAC_st2027	36	CC30	2008	England	North-Central
ERR111103	BSAC_st2040	22	CC22	2008	Scotland	Scotland
ERR111104	BSAC_st2044	22	CC22	2008	Scotland	Scotland
ERR111105	BSAC_st2046	36	CC30	2008	Scotland	Scotland
ERR111043	BSAC_st1778	22	CC22	2008	England	South-East
ERR111106	BSAC_st2057	22	CC22	2008	England	Central- East Midlands
ERR111107	BSAC_st2060	22	CC22	2008	England	Central- East Midlands
ERR111108	BSAC_st2063	22	CC22	2008	England	Central- East Midlands
ERR111109	BSAC_st2064	970	CC22	2008	England	Central- East Midlands
ERR111110	BSAC_st2073	80	unknown_CC	2008	England	North-West 2
ERR111111	BSAC_st2076	22	CC22	2008	England	North-West 2
ERR111112	BSAC_st2078	22	CC22	2008	England	North-West 2
ERR111113	BSAC_st2099	1	CC1	2008	England	North-East 1
ERR111114	BSAC_st2107	22	CC22	2008	England	North-East 1
ERR111115	BSAC_st2109	22	CC22	2008	England	North-East 1
ERR111044	BSAC_st1780	36	CC30	2008	England	South-East
ERR111116	BSAC_st2110	22	CC22	2008	England	North-East 1
ERR111117	BSAC_st2117	22	CC22	2008	England	West Midlands
ERR111118	BSAC_st2121	22	CC22	2008	England	West Midlands
ERR111119	BSAC_st2130	36	CC30	2008	England	West Midlands
ERR111120	BSAC_st2135	22	CC22	2008	England	South-Central
ERR111121	BSAC_st2137	15	CC15	2008	England	South-Central
ERR111122	BSAC_st2148	22	CC22	2008	England	South-Central
ERR111123	BSAC_st2149	36	CC30	2008	England	South-Central
ERR111124	BSAC_st2151	22	CC22	2008	England	South-East
ERR111125	BSAC_st2154	22	CC22	2008	England	South-East
ERR111045	BSAC_st1781	22	CC22	2008	England	South-East
ERR111126	BSAC_st2168	22	CC22	2008	England	South-East
ERR111127	BSAC_st2174	22	CC22	2008	England	North-Central
ERR111128	BSAC_st2175	22	CC22	2008	England	North-Central
ERR111129	BSAC_st2181	22	CC22	2008	England	North-Central
ERR111130	BSAC_st2182	22	CC22	2008	England	North-Central
ERR158617	BSAC_st1113	22	CC22	2005	England	West Midlands
ERR158626	BSAC_st1135	2892	CC22	2005	England	North-Central
ERR158627	BSAC_st1136	22	CC22	2005	England	North-Central
ERR158628	BSAC_st1139	22	CC22	2005	England	North-Central
ERR158629	BSAC_st1140	2892	CC22	2005	England	North-Central
ERR158630	BSAC_st1141	22	CC22	2005	Scotland	Scotland
ERR158631	BSAC_st1142	22	CC22	2005	Scotland	Scotland
ERR158632	BSAC_st1145	22	CC22	2005	Scotland	Scotland
ERR158633	BSAC_st1148	22	CC22	2005	Scotland	Scotland
ERR158634	BSAC_st1149	22	CC22	2005	Scotland	Scotland
ERR158635	BSAC_st1153	22	CC22	2005	England	Central- East Midlands
ERR158618	BSAC_st1114	22	CC22	2005	England	West Midlands
ERR158636	BSAC_st1155	22	CC22	2005	England	Central- East Midlands
ERR158637	BSAC_st1156	22	CC22	2005	England	Central- East Midlands
ERR158638	BSAC_st1162	22	CC22	2005	England	North-West 2
ERR158639	BSAC_st1163	22	CC22	2005	England	North-West 2
ERR158640	BSAC_st1165	22	CC22	2005	England	North-West 2
ERR158641	BSAC_st1171	22	CC22	2005	England	North-East 1
ERR158642	BSAC_st1173	22	CC22	2005	England	North-East 1
ERR158643	BSAC_st1177	22	CC22	2005	England	North-East 1
ERR158644	BSAC_st1179	22	CC22	2005	England	North-East 1
ERR158645	BSAC_st1182	22	CC22	2005	England	West Midlands
ERR158619	BSAC_st1116	22	CC22	2005	England	West Midlands
ERR158646	BSAC_st1185	22	CC22	2005	England	West Midlands
ERR158647	BSAC_st1188	22	CC22	2005	England	West Midlands
ERR158648	BSAC_st1193	5	CC5	2005	England	South-Central
ERR158649	BSAC_st1194	22	CC22	2005	England	South-Central
ERR158650	BSAC_st1197	22	CC22	2005	England	South-Central
ERR158651	BSAC_st1202	22	CC22	2005	England	South-East
ERR158652	BSAC_st1203	36	CC30	2005	England	South-East
ERR158653	BSAC_st1207	2915	CC22	2005	England	South-East
ERR158654	BSAC_st1209	22	CC22	2005	England	South-East
ERR158655	BSAC_st1211	22	CC22	2005	England	North-Central
ERR158620	BSAC_st1118	22	CC22	2005	England	West Midlands
ERR158656	BSAC_st1213	22	CC22	2005	England	North-Central
ERR158657	BSAC_st1216	22	CC22	2005	England	North-Central
ERR158658	BSAC_st1221	22	CC22	2005	England	South-West
ERR158659	BSAC_st1226	22	CC22	2005	England	South-West
ERR158660	BSAC_st1227	36	CC30	2005	England	South-West
ERR158663	BSAC_st1233	22	CC22	2005	England	East 1
ERR158664	BSAC_st1243	22	CC22	2005	England	East 2
ERR158665	BSAC_st1246	22	CC22	2005	England	East 2
ERR158621	BSAC_st1120	22	CC22	2005	England	West Midlands
ERR158666	BSAC_st1247	22	CC22	2005	England	East 2
ERR158667	BSAC_st1249	22	CC22	2005	England	East 2
ERR158668	BSAC_st1251	22	CC22	2006	Northern Ireland	Northern Ireland
ERR158669	BSAC_st1257	22	CC22	2006	Northern Ireland	Northern Ireland
ERR158670	BSAC_st1259	22	CC22	2006	Northern Ireland	Northern Ireland
ERR158671	BSAC_st1265	22	CC22	2006	England	South-East
ERR158672	BSAC_st1268	22	CC22	2006	England	South-East
ERR158673	BSAC_st1270	22	CC22	2006	England	South-East
ERR158674	BSAC_st1271	22	CC22	2006	Wales	Wales
ERR158675	BSAC_st1272	22	CC22	2006	Wales	Wales
ERR158622	BSAC_st1122	22	CC22	2005	Scotland	Scotland
ERR158676	BSAC_st1277	22	CC22	2006	Wales	Wales
ERR158677	BSAC_st1278	22	CC22	2006	Wales	Wales
ERR158678	BSAC_st1281	22	CC22	2006	Ireland	Ireland
ERR158679	BSAC_st1283	22	CC22	2006	Ireland	Ireland
ERR158680	BSAC_st1284	22	CC22	2006	Ireland	Ireland
ERR158681	BSAC_st1285	22	CC22	2006	Ireland	Ireland
ERR158682	BSAC_st1286	22	CC22	2006	Ireland	Ireland
ERR158683	BSAC_st1289	22	CC22	2006	Ireland	Ireland
ERR158685	BSAC_st1291	22	CC22	2006	Northern Ireland	Northern Ireland
ERR158623	BSAC_st1123	22	CC22	2005	Scotland	Scotland
ERR158686	BSAC_st1293	22	CC22	2006	Northern Ireland	Northern Ireland
ERR158687	BSAC_st1295	22	CC22	2006	Northern Ireland	Northern Ireland
ERR158688	BSAC_st1296	22	CC22	2006	Northern Ireland	Northern Ireland
ERR158689	BSAC_st1299	22	CC22	2006	Northern Ireland	Northern Ireland
ERR158690	BSAC_st1300	22	CC22	2006	Northern Ireland	Northern Ireland
ERR158691	BSAC_st1307	5	CC5	2006	England	West Midlands
ERR158692	BSAC_st1308	22	CC22	2006	England	West Midlands
ERR158693	BSAC_st1309	36	CC30	2006	England	West Midlands
ERR158694	BSAC_st1310	36	CC30	2006	England	West Midlands
ERR158695	BSAC_st1312	22	CC22	2006	England	South-West
ERR158624	BSAC_st1127	22	CC22	2005	Scotland	Scotland
ERR158696	BSAC_st1315	1	CC1	2006	England	South-West
ERR158697	BSAC_st1317	22	CC22	2006	England	South-West
ERR158698	BSAC_st1320	22	CC22	2006	England	South-West
ERR158699	BSAC_st1321	22	CC22	2006	England	East 2
ERR158700	BSAC_st1322	22	CC22	2006	England	East 2
ERR158701	BSAC_st1323	22	CC22	2006	England	East 2
ERR158702	BSAC_st1326	22	CC22	2006	England	East 2
ERR158703	BSAC_st1333	36	CC30	2006	Wales	Wales
ERR158704	BSAC_st1334	22	CC22	2006	Wales	Wales
ERR158705	BSAC_st1335	36	CC30	2006	Wales	Wales
ERR158625	BSAC_st1134	22	CC22	2005	England	North-Central
ERR158706	BSAC_st1336	22	CC22	2006	Wales	Wales
ERR158707	BSAC_st1346	22	CC22	2006	England	North-West 1
ERR158708	BSAC_st1352	22	CC22	2006	Ireland	Ireland
ERR158709	BSAC_st1354	22	CC22	2006	Ireland	Ireland
ERR158710	BSAC_st1357	22	CC22	2006	Ireland	Ireland
ERR158713	BSAC_st2187	22	CC22	2008	England	North-Central
ERR158722	BSAC_st2201	22	CC22	2008	England	South-West
ERR158723	BSAC_st2203	22	CC22	2008	England	South-West
ERR158724	BSAC_st2205	22	CC22	2008	England	South-West
ERR158725	BSAC_st2206	22	CC22	2008	England	South-West
ERR158726	BSAC_st2208	22	CC22	2008	England	South-West
ERR158727	BSAC_st2209	36	CC30	2008	England	South-West
ERR158728	BSAC_st2215	22	CC22	2008	England	East 1
ERR158729	BSAC_st2218	22	CC22	2008	England	East 1
ERR158730	BSAC_st2224	22	CC22	2008	England	East 1
ERR158731	BSAC_st2227	22	CC22	2008	England	East 1
ERR158714	BSAC_st2189	22	CC22	2008	England	North-Central
ERR158732	BSAC_st2230	22	CC22	2008	England	East 1
ERR158733	BSAC_st2245	36	CC30	2008	England	East 2
ERR158734	BSAC_st2246	22	CC22	2008	England	East 2
ERR158735	BSAC_st2251	22	CC22	2009	Northern Ireland	Northern Ireland
ERR158736	BSAC_st2252	22	CC22	2009	Northern Ireland	Northern Ireland
ERR158737	BSAC_st2254	22	CC22	2009	Northern Ireland	Northern Ireland
ERR158738	BSAC_st2258	22	CC22	2009	Northern Ireland	Northern Ireland
ERR158739	BSAC_st2260	22	CC22	2009	Northern Ireland	Northern Ireland
ERR158740	BSAC_st2261	22	CC22	2009	Northern Ireland	Northern Ireland
ERR158741	BSAC_st2269	22	CC22	2009	Northern Ireland	Northern Ireland
ERR158715	BSAC_st2190	22	CC22	2008	England	North-Central
ERR158742	BSAC_st2271	36	CC30	2009	England	South-East
ERR158743	BSAC_st2282	22	CC22	2009	England	South-East
ERR158744	BSAC_st2293	5	CC5	2009	Wales	Wales
ERR158745	BSAC_st2295	22	CC22	2009	Wales	Wales
ERR158746	BSAC_st2296	22	CC22	2009	Wales	Wales
ERR158747	BSAC_st2298	36	CC30	2009	Wales	Wales
ERR158748	BSAC_st2299	22	CC22	2009	Wales	Wales
ERR158749	BSAC_st2307	22	CC22	2009	Wales	Wales
ERR158750	BSAC_st2313	22	CC22	2009	Ireland	Ireland
ERR158751	BSAC_st2315	22	CC22	2009	Ireland	Ireland
ERR158716	BSAC_st2194	22	CC22	2008	England	South-West
ERR158752	BSAC_st2316	22	CC22	2009	Ireland	Ireland
ERR158753	BSAC_st2329	22	CC22	2009	Ireland	Ireland
ERR158754	BSAC_st2334	22	CC22	2009	Northern Ireland	Northern Ireland
ERR158755	BSAC_st2343	22	CC22	2009	Northern Ireland	Northern Ireland
ERR158756	BSAC_st2344	779	unknown_CC	2009	Northern Ireland	Northern Ireland
ERR158759	BSAC_st2380	22	CC22	2009	England	South-West
ERR158760	BSAC_st2388	22	CC22	2009	England	South-West
ERR158761	BSAC_st2393	22	CC22	2009	England	East 2
ERR158717	BSAC_st2195	22	CC22	2008	England	South-West
ERR158762	BSAC_st2396	22	CC22	2009	England	East 2
ERR158763	BSAC_st2398	36	CC30	2009	England	East 2
ERR158764	BSAC_st2402	22	CC22	2009	England	East 2
ERR158765	BSAC_st2406	22	CC22	2009	England	East 2
ERR158766	BSAC_st2408	22	CC22	2009	England	East 2
ERR158767	BSAC_st2411	22	CC22	2009	Wales	Wales
ERR158768	BSAC_st2412	22	CC22	2009	Wales	Wales
ERR158769	BSAC_st2414	22	CC22	2009	Wales	Wales
ERR158770	BSAC_st2419	22	CC22	2009	Wales	Wales
ERR158771	BSAC_st2420	22	CC22	2009	Wales	Wales
ERR158718	BSAC_st2196	22	CC22	2008	England	South-West
ERR158772	BSAC_st2424	22	CC22	2009	Wales	Wales
ERR158773	BSAC_st2427	22	CC22	2009	Wales	Wales
ERR158774	BSAC_st2431	22	CC22	2009	England	North-West 1
ERR158775	BSAC_st2436	45	CC45	2009	England	North-West 1
ERR158776	BSAC_st2443	22	CC22	2009	England	North-West 1
ERR158777	BSAC_st2445	2037	CC22	2009	England	North-West 1
ERR158778	BSAC_st2451	22	CC22	2009	Ireland	Ireland
ERR158779	BSAC_st2456	22	CC22	2009	Ireland	Ireland
ERR158780	BSAC_st2457	22	CC22	2009	Ireland	Ireland
ERR158781	BSAC_st2465	22	CC22	2009	Ireland	Ireland
ERR158719	BSAC_st2197	22	CC22	2008	England	South-West
ERR158782	BSAC_st2467	22	CC22	2009	Ireland	Ireland
ERR158783	BSAC_st2468	22	CC22	2009	Ireland	Ireland
ERR158784	BSAC_st2471	22	CC22	2009	England	West Midlands
ERR158785	BSAC_st2474	22	CC22	2009	England	West Midlands
ERR158786	BSAC_st2476	22	CC22	2009	England	West Midlands
ERR158787	BSAC_st2477	22	CC22	2009	England	West Midlands
ERR158788	BSAC_st2481	22	CC22	2009	England	West Midlands
ERR158789	BSAC_st2484	22	CC22	2009	England	West Midlands
ERR158790	BSAC_st2491	22	CC22	2009	Scotland	Scotland
ERR158791	BSAC_st2492	22	CC22	2009	Scotland	Scotland
ERR158720	BSAC_st2198	22	CC22	2008	England	South-West
ERR158792	BSAC_st2493	22	CC22	2009	Scotland	Scotland
ERR158793	BSAC_st2494	22	CC22	2009	Scotland	Scotland
ERR158794	BSAC_st2506	22	CC22	2009	Scotland	Scotland
ERR158795	BSAC_st2515	22	CC22	2009	England	North-Central
ERR158796	BSAC_st2523	22	CC22	2009	England	North-Central
ERR158797	BSAC_st2527	22	CC22	2009	England	North-Central
ERR158798	BSAC_st2530	22	CC22	2009	England	North-Central
ERR158799	BSAC_st2533	22	CC22	2009	Scotland	Scotland
ERR158800	BSAC_st2534	36	CC30	2009	Scotland	Scotland
ERR158801	BSAC_st2540	22	CC22	2009	Scotland	Scotland
ERR158721	BSAC_st2200	22	CC22	2008	England	South-West
ERR158802	BSAC_st2543	36	CC30	2009	Scotland	Scotland
ERR158803	BSAC_st2548	22	CC22	2009	Scotland	Scotland
ERR158804	BSAC_st2550	22	CC22	2009	Scotland	Scotland
ERR158805	BSAC_st2566	22	CC22	2009	England	Central- East Midlands
ERR158806	BSAC_st2570	22	CC22	2009	England	Central- East Midlands
ERR118330	BSAC_st977	2274	CC22	2004	England	South-West
ERR118339	BSAC_st998	22	CC22	2004	England	East 2
ERR118340	BSAC_st999	22	CC22	2004	England	East 2
ERR118341	BSAC_st1000	22	CC22	2004	England	East 2
ERR118342	BSAC_st1002	22	CC22	2005	Northern Ireland	Northern Ireland
ERR118343	BSAC_st1003	22	CC22	2005	Northern Ireland	Northern Ireland
ERR118344	BSAC_st1004	22	CC22	2005	Northern Ireland	Northern Ireland
ERR118345	BSAC_st1009	22	CC22	2005	Northern Ireland	Northern Ireland
ERR118346	BSAC_st1011	36	CC30	2005	England	South-East
ERR118347	BSAC_st1013	36	CC30	2005	England	South-East
ERR118348	BSAC_st1014	22	CC22	2005	England	South-East
ERR118331	BSAC_st978	22	CC22	2004	England	South-West
ERR118349	BSAC_st1015	22	CC22	2005	England	South-East
ERR118350	BSAC_st1016	22	CC22	2005	England	South-East
ERR118351	BSAC_st1021	22	CC22	2005	Wales	Wales
ERR118352	BSAC_st1023	22	CC22	2005	Wales	Wales
ERR118353	BSAC_st1024	22	CC22	2005	Wales	Wales
ERR118354	BSAC_st1025	22	CC22	2005	Wales	Wales
ERR118355	BSAC_st1027	36	CC30	2005	Wales	Wales
ERR118356	BSAC_st1028	2890	CC5	2005	Wales	Wales
ERR118357	BSAC_st1039	22	CC22	2005	Ireland	Ireland
ERR118358	BSAC_st1044	22	CC22	2005	Northern Ireland	Northern Ireland
ERR118332	BSAC_st983	22	CC22	2004	England	East 1
ERR118359	BSAC_st1045	22	CC22	2005	Northern Ireland	Northern Ireland
ERR118360	BSAC_st1051	2908	CC22	2005	England	West Midlands
ERR118361	BSAC_st1059	22	CC22	2005	England	West Midlands
ERR118362	BSAC_st1061	22	CC22	2005	England	South-West
ERR118363	BSAC_st1062	5	CC5	2005	England	South-West
ERR118364	BSAC_st1069	22	CC22	2005	England	South-West
ERR118365	BSAC_st1070	1	CC1	2005	England	South-West
ERR118366	BSAC_st1071	22	CC22	2005	England	East 2
ERR118367	BSAC_st1072	36	CC30	2005	England	East 2
ERR118368	BSAC_st1074	22	CC22	2005	England	East 2
ERR118333	BSAC_st987	22	CC22	2004	England	East 1
ERR118369	BSAC_st1075	22	CC22	2005	England	East 2
ERR118370	BSAC_st1079	22	CC22	2005	England	East 2
ERR118371	BSAC_st1096	36	CC30	2005	England	North-West 1
ERR118372	BSAC_st1097	22	CC22	2005	England	North-West 1
ERR118373	BSAC_st1105	22	CC22	2005	Ireland	Ireland
ERR118376	BSAC_st1111	22	CC22	2005	England	West Midlands
ERR118377	BSAC_st1358	45	CC45	2006	Ireland	Ireland
ERR118378	BSAC_st1360	22	CC22	2006	Ireland	Ireland
ERR118334	BSAC_st988	8	CC8	2004	England	East 1
ERR118379	BSAC_st1362	22	CC22	2006	England	West Midlands
ERR118380	BSAC_st1363	22	CC22	2006	England	West Midlands
ERR118381	BSAC_st1364	22	CC22	2006	England	West Midlands
ERR118382	BSAC_st1366	22	CC22	2006	England	West Midlands
ERR118383	BSAC_st1376	36	CC30	2006	Scotland	Scotland
ERR118384	BSAC_st1377	22	CC22	2006	Scotland	Scotland
ERR118385	BSAC_st1378	22	CC22	2006	Scotland	Scotland
ERR118386	BSAC_st1379	36	CC30	2006	Scotland	Scotland
ERR118387	BSAC_st1380	22	CC22	2006	Scotland	Scotland
ERR118388	BSAC_st1383	22	CC22	2006	England	North-Central
ERR118335	BSAC_st990	22	CC22	2004	England	East 1
ERR118389	BSAC_st1386	22	CC22	2006	England	North-Central
ERR118390	BSAC_st1387	22	CC22	2006	England	North-Central
ERR118391	BSAC_st1388	22	CC22	2006	England	North-Central
ERR118392	BSAC_st1395	22	CC22	2006	Scotland	Scotland
ERR118393	BSAC_st1396	22	CC22	2006	Scotland	Scotland
ERR118394	BSAC_st1397	36	CC30	2006	Scotland	Scotland
ERR118395	BSAC_st1399	36	CC30	2006	Scotland	Scotland
ERR118396	BSAC_st1401	22	CC22	2006	England	Central- East Midlands
ERR118397	BSAC_st1403	22	CC22	2006	England	Central- East Midlands
ERR118398	BSAC_st1405	22	CC22	2006	England	Central- East Midlands
ERR118336	BSAC_st991	22	CC22	2004	England	East 2
ERR118399	BSAC_st1425	22	CC22	2006	England	North-East 1
ERR118400	BSAC_st1426	22	CC22	2006	England	North-East 1
ERR118401	BSAC_st1429	22	CC22	2006	England	North-East 1
ERR118402	BSAC_st1432	22	CC22	2006	England	West Midlands
ERR118403	BSAC_st1433	22	CC22	2006	England	West Midlands
ERR118404	BSAC_st1434	36	CC30	2006	England	West Midlands
ERR118405	BSAC_st1439	22	CC22	2006	England	West Midlands
ERR118406	BSAC_st1442	22	CC22	2006	England	South-Central
ERR118407	BSAC_st1443	22	CC22	2006	England	South-Central
ERR118408	BSAC_st1444	22	CC22	2006	England	South-Central
ERR118337	BSAC_st996	22	CC22	2004	England	East 2
ERR118409	BSAC_st1445	36	CC30	2006	England	South-Central
ERR118410	BSAC_st1446	36	CC30	2006	England	South-Central
ERR118411	BSAC_st1447	22	CC22	2006	England	South-Central
ERR118412	BSAC_st1449	22	CC22	2006	England	South-Central
ERR118413	BSAC_st1450	22	CC22	2006	England	South-Central
ERR118414	BSAC_st1451	22	CC22	2006	England	South-East
ERR118415	BSAC_st1452	22	CC22	2006	England	South-East
ERR118416	BSAC_st1455	36	CC30	2006	England	South-East
ERR118417	BSAC_st1458	22	CC22	2006	England	South-East
ERR118418	BSAC_st1460	36	CC30	2006	England	South-East
ERR118338	BSAC_st997	22	CC22	2004	England	East 2
ERR118419	BSAC_st1461	22	CC22	2006	England	North-Central
ERR118420	BSAC_st1464	22	CC22	2006	England	North-Central
ERR118421	BSAC_st1465	22	CC22	2006	England	North-Central
ERR118422	BSAC_st1466	36	CC30	2006	England	North-Central
ERR118423	BSAC_st1469	22	CC22	2006	England	North-Central
ERR118426	BSAC_st1472	36	CC30	2006	England	South-West
ERR118435	BSAC_st1493	22	CC22	2006	England	East 2
ERR118436	BSAC_st1495	22	CC22	2006	England	East 2
ERR118437	BSAC_st1496	22	CC22	2006	England	East 2
ERR118438	BSAC_st1500	22	CC22	2006	England	East 2
ERR118439	BSAC_st1503	22	CC22	2007	Northern Ireland	Northern Ireland
ERR118440	BSAC_st1506	22	CC22	2007	Northern Ireland	Northern Ireland
ERR118441	BSAC_st1511	22	CC22	2007	England	South-East
ERR118442	BSAC_st1521	22	CC22	2007	Wales	Wales
ERR118443	BSAC_st1522	22	CC22	2007	Wales	Wales
ERR118444	BSAC_st1523	22	CC22	2007	Wales	Wales
ERR118427	BSAC_st1474	22	CC22	2006	England	South-West
ERR118445	BSAC_st1525	22	CC22	2007	Wales	Wales
ERR118446	BSAC_st1526	22	CC22	2007	Wales	Wales
ERR118447	BSAC_st1527	22	CC22	2007	Wales	Wales
ERR118448	BSAC_st1530	22	CC22	2007	Wales	Wales
ERR118449	BSAC_st1531	22	CC22	2007	Ireland	Ireland
ERR118450	BSAC_st1536	22	CC22	2007	Ireland	Ireland
ERR118451	BSAC_st1540	22	CC22	2007	Ireland	Ireland
ERR118452	BSAC_st1547	22	CC22	2007	Northern Ireland	Northern Ireland
ERR118453	BSAC_st1549	22	CC22	2007	Northern Ireland	Northern Ireland
ERR118454	BSAC_st1553	22	CC22	2007	England	West Midlands
ERR118428	BSAC_st1476	2274	CC22	2006	England	South-West
ERR118455	BSAC_st1561	1	CC1	2007	England	South-West
ERR118456	BSAC_st1565	1	CC1	2007	England	South-West
ERR118457	BSAC_st1570	30	CC30	2007	England	South-West
ERR118458	BSAC_st1571	22	CC22	2007	England	East 2
ERR118459	BSAC_st1578	22	CC22	2007	England	East 2
ERR118460	BSAC_st1581	22	CC22	2007	Wales	Wales
ERR118461	BSAC_st1583	22	CC22	2007	Wales	Wales
ERR118462	BSAC_st1584	22	CC22	2007	Wales	Wales
ERR118463	BSAC_st1589	22	CC22	2007	Wales	Wales
ERR118464	BSAC_st1592	22	CC22	2007	England	North-West 1
ERR118429	BSAC_st1477	22	CC22	2006	England	South-West
ERR118465	BSAC_st1594	22	CC22	2007	England	North-West 1
ERR118466	BSAC_st1595	22	CC22	2007	England	North-West 1
ERR118467	BSAC_st1596	22	CC22	2007	England	North-West 1
ERR118468	BSAC_st1597	22	CC22	2007	England	North-West 1
ERR118469	BSAC_st1599	22	CC22	2007	England	North-West 1
ERR118472	BSAC_st1604	22	CC22	2007	Ireland	Ireland
ERR118473	BSAC_st1607	36	CC30	2007	Ireland	Ireland
ERR118474	BSAC_st1608	22	CC22	2007	Ireland	Ireland
ERR118430	BSAC_st1482	22	CC22	2006	England	East 1
ERR118475	BSAC_st1611	22	CC22	2007	England	West Midlands
ERR118476	BSAC_st1613	22	CC22	2007	England	West Midlands
ERR118477	BSAC_st1614	2893	CC22	2007	England	West Midlands
ERR118478	BSAC_st1620	22	CC22	2007	England	West Midlands
ERR118479	BSAC_st1625	22	CC22	2007	Scotland	Scotland
ERR118480	BSAC_st1632	36	CC30	2007	England	North-Central
ERR118481	BSAC_st1634	22	CC22	2007	England	North-Central
ERR118482	BSAC_st1638	22	CC22	2007	England	North-Central
ERR118483	BSAC_st1642	22	CC22	2007	Scotland	Scotland
ERR118484	BSAC_st1643	36	CC30	2007	Scotland	Scotland
ERR118431	BSAC_st1483	36	CC30	2006	England	East 1
ERR118485	BSAC_st1649	22	CC22	2007	Scotland	Scotland
ERR118486	BSAC_st1654	22	CC22	2007	England	Central- East Midlands
ERR118487	BSAC_st1655	22	CC22	2007	England	Central- East Midlands
ERR118488	BSAC_st1659	22	CC22	2007	England	Central- East Midlands
ERR118489	BSAC_st1663	2031	CC22	2007	England	North-West 2
ERR118490	BSAC_st1664	5	CC5	2007	England	North-West 2
ERR118491	BSAC_st1665	22	CC22	2007	England	North-West 2
ERR118492	BSAC_st1666	22	CC22	2007	England	North-West 2
ERR118493	BSAC_st1667	2031	CC22	2007	England	North-West 2
ERR118494	BSAC_st1670	22	CC22	2007	England	North-West 2
ERR118432	BSAC_st1484	22	CC22	2006	England	East 1
ERR118495	BSAC_st1671	22	CC22	2007	England	North-East 1
ERR118496	BSAC_st1684	36	CC30	2007	England	West Midlands
ERR118497	BSAC_st1689	22	CC22	2007	England	West Midlands
ERR118498	BSAC_st1690	36	CC30	2007	England	West Midlands
ERR118499	BSAC_st1691	22	CC22	2007	England	South-Central
ERR118500	BSAC_st1692	22	CC22	2007	England	South-Central
ERR118501	BSAC_st1696	2274	CC22	2007	England	South-Central
ERR118502	BSAC_st1699	22	CC22	2007	England	South-Central
ERR118503	BSAC_st1701	22	CC22	2007	England	South-East
ERR118504	BSAC_st1703	22	CC22	2007	England	South-East
ERR118433	BSAC_st1487	36	CC30	2006	England	East 1
ERR118505	BSAC_st1707	22	CC22	2007	England	South-East
ERR118506	BSAC_st1708	22	CC22	2007	England	South-East
ERR118507	BSAC_st1709	36	CC30	2007	England	South-East
ERR118508	BSAC_st1711	22	CC22	2007	England	North-Central
ERR118509	BSAC_st1712	22	CC22	2007	England	North-Central
ERR118510	BSAC_st1717	2926	CC22	2007	England	North-Central
ERR118511	BSAC_st1723	22	CC22	2007	England	South-West
ERR118512	BSAC_st1725	22	CC22	2007	England	South-West
ERR118513	BSAC_st1728	36	CC30	2007	England	South-West
ERR118514	BSAC_st1730	2274	CC22	2007	England	South-West
ERR118434	BSAC_st1489	22	CC22	2006	England	East 1
ERR118515	BSAC_st1735	22	CC22	2007	England	East 1
ERR118516	BSAC_st1738	22	CC22	2007	England	East 1
ERR118517	BSAC_st1740	22	CC22	2007	England	East 1
ERR118520	BSAC_st105	22	CC22	2001	Ireland	Ireland
ERR118529	BSAC_st124	5	CC5	2001	England	North-Central
ERR118530	BSAC_st127	36	CC30	2001	England	North-Central
ERR118531	BSAC_st128	22	CC22	2001	England	North-Central
ERR118532	BSAC_st133	22	CC22	2001	Scotland	Scotland
ERR118533	BSAC_st134	22	CC22	2001	Scotland	Scotland
ERR118534	BSAC_st139	22	CC22	2001	Scotland	Scotland
ERR118535	BSAC_st140	36	CC30	2001	Scotland	Scotland
ERR118536	BSAC_st144	22	CC22	2001	England	North-West 2
ERR118537	BSAC_st145	22	CC22	2001	England	North-West 2
ERR118538	BSAC_st146	22	CC22	2001	England	North-West 2
ERR118521	BSAC_st107	22	CC22	2001	Ireland	Ireland
ERR118539	BSAC_st148	22	CC22	2001	England	North-West 2
ERR118540	BSAC_st162	36	CC30	2001	Scotland	Scotland
ERR118541	BSAC_st164	22	CC22	2001	Scotland	Scotland
ERR118542	BSAC_st166	36	CC30	2001	Scotland	Scotland
ERR118543	BSAC_st168	36	CC30	2001	Scotland	Scotland
ERR118544	BSAC_st169	36	CC30	2001	Scotland	Scotland
ERR118545	BSAC_st170	22	CC22	2001	Scotland	Scotland
ERR118546	BSAC_st172	22	CC22	2001	England	East 2
ERR118547	BSAC_st175	36	CC30	2001	England	East 2
ERR118548	BSAC_st176	22	CC22	2001	England	East 2
ERR118522	BSAC_st110	8	CC8	2001	Ireland	Ireland
ERR118549	BSAC_st177	36	CC30	2001	England	East 2
ERR118550	BSAC_st180	22	CC22	2001	England	East 2
ERR118551	BSAC_st185	22	CC22	2001	England	Central- East Midlands
ERR118552	BSAC_st186	22	CC22	2001	England	Central- East Midlands
ERR118553	BSAC_st187	22	CC22	2001	England	Central- East Midlands
ERR118554	BSAC_st189	22	CC22	2001	England	Central- East Midlands
ERR118555	BSAC_st191	22	CC22	2001	England	North-East 1
ERR118556	BSAC_st193	22	CC22	2001	England	North-East 1
ERR118557	BSAC_st194	22	CC22	2001	England	North-East 1
ERR118558	BSAC_st203	22	CC22	2001	England	West Midlands
ERR118523	BSAC_st112	36	CC30	2001	England	West Midlands
ERR118559	BSAC_st207	22	CC22	2001	England	West Midlands
ERR118560	BSAC_st211	36	CC30	2001	England	South-Central
ERR118561	BSAC_st212	22	CC22	2001	England	South-Central
ERR118562	BSAC_st213	22	CC22	2001	England	South-Central
ERR118563	BSAC_st214	22	CC22	2001	England	South-Central
ERR118566	BSAC_st219	22	CC22	2001	England	South-Central
ERR118567	BSAC_st223	22	CC22	2001	England	South-East
ERR118568	BSAC_st228	5	CC5	2001	England	South-East
ERR118524	BSAC_st112b	36	CC30	2001	England	West Midlands
ERR118569	BSAC_st232	36	CC30	2001	England	South-West
ERR118570	BSAC_st233	36	CC30	2001	England	South-West
ERR118571	BSAC_st234	22	CC22	2001	England	South-West
ERR118572	BSAC_st235	22	CC22	2001	England	South-West
ERR118573	BSAC_st236	22	CC22	2001	England	South-West
ERR118574	BSAC_st241	36	CC30	2001	England	East 1
ERR118575	BSAC_st246	22	CC22	2001	England	East 1
ERR118576	BSAC_st247	36	CC30	2001	England	East 1
ERR118577	BSAC_st254	22	CC22	2002	Northern Ireland	Northern Ireland
ERR118578	BSAC_st255	22	CC22	2002	Northern Ireland	Northern Ireland
ERR118525	BSAC_st113	22	CC22	2001	England	West Midlands
ERR118579	BSAC_st257	22	CC22	2002	Northern Ireland	Northern Ireland
ERR118580	BSAC_st262	36	CC30	2002	England	South-East
ERR118581	BSAC_st263	22	CC22	2002	England	South-East
ERR118582	BSAC_st264	36	CC30	2002	England	South-East
ERR118583	BSAC_st266	36	CC30	2002	England	South-East
ERR118584	BSAC_st269	22	CC22	2002	England	South-East
ERR118585	BSAC_st273	22	CC22	2002	Wales	Wales
ERR118586	BSAC_st277	5	CC5	2002	Wales	Wales
ERR118587	BSAC_st282	22	CC22	2002	Ireland	Ireland
ERR118588	BSAC_st284	22	CC22	2002	Ireland	Ireland
ERR118526	BSAC_st118	22	CC22	2001	England	West Midlands
ERR118589	BSAC_st289	22	CC22	2002	Ireland	Ireland
ERR118590	BSAC_st292	22	CC22	2002	Northern Ireland	Northern Ireland
ERR118591	BSAC_st297	8	CC8	2002	Northern Ireland	Northern Ireland
ERR118592	BSAC_st301	22	CC22	2002	England	West Midlands
ERR118593	BSAC_st302	22	CC22	2002	England	West Midlands
ERR118594	BSAC_st303	22	CC22	2002	England	West Midlands
ERR118595	BSAC_st304	1	CC1	2002	England	West Midlands
ERR118596	BSAC_st305	36	CC30	2002	England	West Midlands
ERR118597	BSAC_st306	36	CC30	2002	England	West Midlands
ERR118598	BSAC_st308	36	CC30	2002	England	West Midlands
ERR118527	BSAC_st120	22	CC22	2001	England	West Midlands
ERR118599	BSAC_st309	36	CC30	2002	England	West Midlands
ERR118600	BSAC_st311	22	CC22	2002	England	South-West
ERR118601	BSAC_st313	22	CC22	2002	England	South-West
ERR118602	BSAC_st314	1	CC1	2002	England	South-West
ERR118603	BSAC_st321	22	CC22	2002	Wales	Wales
ERR118604	BSAC_st324	22	CC22	2002	Wales	Wales
ERR118605	BSAC_st325	22	CC22	2002	Wales	Wales
ERR118606	BSAC_st328	22	CC22	2002	Wales	Wales
ERR118607	BSAC_st330	22	CC22	2002	Wales	Wales
ERR118608	BSAC_st331	36	CC30	2002	England	East 2
ERR118528	BSAC_st121	22	CC22	2001	England	North-Central
ERR118609	BSAC_st333	22	CC22	2002	England	East 2
ERR118610	BSAC_st336	36	CC30	2002	England	East 2
ERR118611	BSAC_st338	36	CC30	2002	England	East 2
ERR118612	BSAC_st340	22	CC22	2002	England	East 2
ERR118613	BSAC_st341	22	CC22	2002	England	North-West 1
ERR124437	BSAC_st500	36	CC30	2002	England	East 1
ERR124446	BSAC_st1542	22	CC22	2007	Northern Ireland	Northern Ireland
ERR124447	BSAC_st2014	22	CC22	2008	England	North-Central
ERR124448	BSAC_st2072	22	CC22	2008	England	North-West 2
ERR124450	BSAC_st2808	22	CC22	2010	Ireland	Ireland
ERR124451	BSAC_st2809	22	CC22	2010	Ireland	Ireland
ERR124452	BSAC_st2812	22	CC22	2010	Ireland	Ireland
ERR124453	BSAC_st2815	22	CC22	2010	Ireland	Ireland
ERR124454	BSAC_st2819	22	CC22	2010	Ireland	Ireland
ERR124455	BSAC_st2823	22	CC22	2010	Northern Ireland	Northern Ireland
ERR124438	BSAC_st508	22	CC22	2003	Northern Ireland	Northern Ireland
ERR124456	BSAC_st2825	22	CC22	2010	Northern Ireland	Northern Ireland
ERR124457	BSAC_st2827	22	CC22	2010	Northern Ireland	Northern Ireland
ERR124458	BSAC_st2832	22	CC22	2010	Northern Ireland	Northern Ireland
ERR124460	BSAC_st2874	22	CC22	2010	England	East 2
ERR124461	BSAC_st2878	22	CC22	2010	Wales	Wales
ERR124462	BSAC_st2880	970	CC22	2010	Wales	Wales
ERR124463	BSAC_st2881	22	CC22	2010	Wales	Wales
ERR124464	BSAC_st2885	22	CC22	2010	Wales	Wales
ERR124465	BSAC_st2886	22	CC22	2010	Wales	Wales
ERR124439	BSAC_st523	36	CC30	2003	Wales	Wales
ERR124466	BSAC_st2889	2916	CC22	2010	Wales	Wales
ERR124467	BSAC_st2890	22	CC22	2010	Wales	Wales
ERR124468	BSAC_st2897	22	CC22	2010	England	North-West 1
ERR124469	BSAC_st2898	22	CC22	2010	England	North-West 1
ERR124470	BSAC_st2901	22	CC22	2010	England	North-West 1
ERR124471	BSAC_st2908	22	CC22	2010	England	South-East
ERR124472	BSAC_st2910	36	CC30	2010	England	South-East
ERR124473	BSAC_st2917	22	CC22	2010	England	South-East
ERR124474	BSAC_st2920	22	CC22	2010	Ireland	Ireland
ERR124475	BSAC_st2921	8	CC8	2010	Ireland	Ireland
ERR124440	BSAC_st558	36	CC30	2003	England	West Midlands
ERR124476	BSAC_st2923	22	CC22	2010	Ireland	Ireland
ERR124478	BSAC_st2930	22	CC22	2010	Ireland	Ireland
ERR124479	BSAC_st2932	22	CC22	2010	Ireland	Ireland
ERR124480	BSAC_st2935	22	CC22	2010	England	West Midlands
ERR124483	BSAC_st2953	22	CC22	2010	Scotland	Scotland
ERR124484	BSAC_st2954	22	CC22	2010	Scotland	Scotland
ERR124485	BSAC_st2956	22	CC22	2010	Scotland	Scotland
ERR124441	BSAC_st577	22	CC22	2003	England	East 2
ERR124486	BSAC_st2968	22	CC22	2010	England	North-Central
ERR124487	BSAC_st2975	36	CC30	2010	England	South-East
ERR124488	BSAC_st2994	22	CC22	2010	England	Central- East Midlands
ERR124489	BSAC_st2999	22	CC22	2010	England	Central- East Midlands
ERR124490	BSAC_st3001	22	CC22	2010	England	Central- East Midlands
ERR124491	BSAC_st3004	22	CC22	2010	England	North-West 2
ERR124492	BSAC_st3020	22	CC22	2010	England	South-West
ERR124493	BSAC_st3021	239	CC8	2010	England	South-West
ERR124494	BSAC_st3023	22	CC22	2010	England	South-West
ERR124495	BSAC_st3046	239	CC8	2010	England	South-East
ERR124442	BSAC_st642	36	CC30	2003	Scotland	Scotland
ERR124496	BSAC_st3047	338	CC59	2010	England	South-East
ERR124497	BSAC_st3049	22	CC22	2010	England	South-East
ERR124498	BSAC_st3056	36	CC30	2010	England	South-East
ERR124499	BSAC_st3059	45	CC45	2010	Scotland	Scotland
ERR124500	BSAC_st3068	22	CC22	2010	Scotland	Scotland
ERR124501	BSAC_st3095	22	CC22	2010	England	West Midlands
ERR124502	BSAC_st3102	22	CC22	2010	Scotland	Scotland
ERR124503	BSAC_st3103	8	CC8	2010	Scotland	Scotland
ERR124504	BSAC_st3113	22	CC22	2010	Scotland	Scotland
ERR124505	BSAC_st3116	22	CC22	2010	England	South-Central
ERR124443	BSAC_st859	8	CC8	2004	Ireland	Ireland
ERR124506	BSAC_st3125	22	CC22	2010	England	South-Central
ERR124507	BSAC_st3129	22	CC22	2010	England	East 1
ERR124508	BSAC_st3136	36	CC30	2010	England	East 1
ERR124509	BSAC_st3142	22	CC22	2010	England	East 1
ERR124510	BSAC_st3171	22	CC22	2010	England	North-Central
ERR124511	BSAC_st3179	22	CC22	2010	England	North-Central
ERR124512	BSAC_st3180	22	CC22	2010	England	North-Central
ERR124513	BSAC_st3193	22	CC22	2010	England	South-West
ERR124514	BSAC_st3199	22	CC22	2010	Northern Ireland	Northern Ireland
ERR124515	BSAC_st3203	22	CC22	2010	Northern Ireland	Northern Ireland
ERR124444	BSAC_st885	22	CC22	2004	England	North-Central
ERR124516	BSAC_st3214	22	CC22	2010	Ireland	Ireland
ERR124517	BSAC_st3218	22	CC22	2010	Ireland	Ireland
ERR124518	BSAC_st3222	22	CC22	2010	Ireland	Ireland
ERR124519	BSAC_st3241	22	CC22	2010	England	East 2
ERR124520	BSAC_st3257	22	CC22	2010	Scotland	Scotland
ERR124521	BSAC_st3258	22	CC22	2010	Scotland	Scotland
ERR124522	BSAC_st3261	22	CC22	2010	Scotland	Scotland
ERR124523	BSAC_st3262	22	CC22	2010	Scotland	Scotland
ERR124524	BSAC_st3263	22	CC22	2010	Scotland	Scotland
ERR124525	BSAC_st3265	22	CC22	2010	Scotland	Scotland
ERR124445	BSAC_st995	22	CC22	2004	England	East 2
ERR124526	BSAC_st3279	22	CC22	2010	Wales	Wales
ERR124527	BSAC_st3281	22	CC22	2010	Wales	Wales
ERR124528	BSAC_st3283	22	CC22	2010	England	South-West
ERR124529	BSAC_st3287	22	CC22	2010	England	South-West
ERR124530	BSAC_st3304	8	CC8	2010	England	South-East
ERR129253	BSAC_st633	22	CC22	2003	England	North-Central
ERR129262	BSAC_st664	22	CC22	2003	England	North-East 1
ERR129263	BSAC_st666	22	CC22	2003	England	North-East 1
ERR129264	BSAC_st672	22	CC22	2003	England	West Midlands
ERR129265	BSAC_st673	22	CC22	2003	England	West Midlands
ERR129266	BSAC_st674	22	CC22	2003	England	West Midlands
ERR129267	BSAC_st676	8	CC8	2003	England	West Midlands
ERR129268	BSAC_st677	36	CC30	2003	England	West Midlands
ERR129269	BSAC_st678	36	CC30	2003	England	West Midlands
ERR129270	BSAC_st679	36	CC30	2003	England	West Midlands
ERR129271	BSAC_st684	22	CC22	2003	England	South-Central
ERR129254	BSAC_st637	22	CC22	2003	England	North-Central
ERR129272	BSAC_st685	22	CC22	2003	England	South-Central
ERR129273	BSAC_st686	22	CC22	2003	England	South-Central
ERR129274	BSAC_st687	22	CC22	2003	England	South-Central
ERR129275	BSAC_st688	22	CC22	2003	England	South-Central
ERR129276	BSAC_st693	36	CC30	2003	England	South-East
ERR129277	BSAC_st694	22	CC22	2003	England	South-East
ERR129278	BSAC_st695	22	CC22	2003	England	South-East
ERR129279	BSAC_st697	239	CC8	2003	England	South-East
ERR129280	BSAC_st698	30	CC30	2003	England	South-East
ERR129281	BSAC_st699	8	CC8	2003	England	South-East
ERR129255	BSAC_st648	36	CC30	2003	Scotland	Scotland
ERR129282	BSAC_st701	22	CC22	2003	England	North-Central
ERR129283	BSAC_st703	22	CC22	2003	England	North-Central
ERR129284	BSAC_st704	22	CC22	2003	England	North-Central
ERR129285	BSAC_st706	22	CC22	2003	England	North-Central
ERR129286	BSAC_st711	36	CC30	2003	England	South-West
ERR129287	BSAC_st714	22	CC22	2003	England	South-West
ERR129288	BSAC_st716	22	CC22	2003	England	South-West
ERR129289	BSAC_st718	36	CC30	2003	England	South-West
ERR129290	BSAC_st725	22	CC22	2003	England	East 1
ERR129291	BSAC_st731	22	CC22	2003	England	East 2
ERR129256	BSAC_st649	22	CC22	2003	Scotland	Scotland
ERR129292	BSAC_st732	22	CC22	2003	England	East 2
ERR129293	BSAC_st736	36	CC30	2003	England	East 2
ERR129294	BSAC_st752	22	CC22	2004	Northern Ireland	Northern Ireland
ERR129295	BSAC_st754	22	CC22	2004	Northern Ireland	Northern Ireland
ERR129296	BSAC_st755	22	CC22	2004	Northern Ireland	Northern Ireland
ERR129299	BSAC_st762	2938	CC30	2004	England	South-East
ERR129300	BSAC_st763	22	CC22	2004	England	South-East
ERR129301	BSAC_st764	22	CC22	2004	England	South-East
ERR129257	BSAC_st651	22	CC22	2003	England	North-West 2
ERR129302	BSAC_st765	36	CC30	2004	England	South-East
ERR129303	BSAC_st766	22	CC22	2004	England	South-East
ERR129304	BSAC_st769	2916	CC22	2004	England	South-East
ERR129305	BSAC_st774	5	CC5	2004	Wales	Wales
ERR129306	BSAC_st776	5	CC5	2004	Wales	Wales
ERR129307	BSAC_st778	22	CC22	2004	Wales	Wales
ERR129308	BSAC_st779	22	CC22	2004	Wales	Wales
ERR129309	BSAC_st781	22	CC22	2004	Ireland	Ireland
ERR129310	BSAC_st787	22	CC22	2004	Ireland	Ireland
ERR129311	BSAC_st792	22	CC22	2004	Northern Ireland	Northern Ireland
ERR129258	BSAC_st653	36	CC30	2003	England	North-West 2
ERR129312	BSAC_st793	22	CC22	2004	Northern Ireland	Northern Ireland
ERR129313	BSAC_st798	22	CC22	2004	Northern Ireland	Northern Ireland
ERR129314	BSAC_st799	22	CC22	2004	Northern Ireland	Northern Ireland
ERR129315	BSAC_st803	22	CC22	2004	England	West Midlands
ERR129316	BSAC_st804	22	CC22	2004	England	West Midlands
ERR129317	BSAC_st805	22	CC22	2004	England	West Midlands
ERR129318	BSAC_st808	36	CC30	2004	England	West Midlands
ERR129319	BSAC_st810	22	CC22	2004	England	West Midlands
ERR129320	BSAC_st812	22	CC22	2004	England	South-West
ERR129321	BSAC_st816	22	CC22	2004	England	South-West
ERR129259	BSAC_st659	5	CC5	2003	England	North-West 2
ERR129322	BSAC_st820	22	CC22	2004	England	South-West
ERR129323	BSAC_st821	36	CC30	2004	England	East 2
ERR129324	BSAC_st823	36	CC30	2004	England	East 2
ERR129325	BSAC_st825	22	CC22	2004	England	East 2
ERR129326	BSAC_st827	36	CC30	2004	England	East 2
ERR129327	BSAC_st831	22	CC22	2004	Wales	Wales
ERR129328	BSAC_st832	22	CC22	2004	Wales	Wales
ERR129329	BSAC_st837	22	CC22	2004	Wales	Wales
ERR129260	BSAC_st660	22	CC22	2003	England	North-West 2
ERR129330	BSAC_st849	22	CC22	2004	England	North-West 1
ERR129331	BSAC_st850	22	CC22	2004	England	North-West 1
ERR129332	BSAC_st852	105	CC5	2004	Ireland	Ireland
ERR129333	BSAC_st854	22	CC22	2004	Ireland	Ireland
ERR129261	BSAC_st661	22	CC22	2003	England	North-East 1
ERR129334	BSAC_st857	22	CC22	2004	Ireland	Ireland
ERR129335	BSAC_st864	22	CC22	2004	England	West Midlands
ERR134332	BSAC_st274	36	CC30	2002	Wales	Wales
ERR134341	BSAC_st772	36	CC30	2004	Wales	Wales
ERR134342	BSAC_st773	2939	CC30	2004	Wales	Wales
ERR134343	BSAC_st1012	97	CC97	2005	England	South-East
ERR134344	BSAC_st1066	36	CC30	2005	England	South-West
ERR134345	BSAC_st1318	36	CC30	2006	England	South-West
ERR134346	BSAC_st1332	9	CC9	2006	Wales	Wales
ERR134347	BSAC_st1390	22	CC22	2006	England	North-Central
ERR134348	BSAC_st1424	2905	CC5	2006	England	North-East 1
ERR134349	BSAC_st1470	25	CC25	2006	England	North-Central
ERR134350	BSAC_st1498	15	CC15	2006	England	East 2
ERR134333	BSAC_st278	605	CC30	2002	Wales	Wales
ERR134351	BSAC_st1509	1	CC1	2007	Northern Ireland	Northern Ireland
ERR134352	BSAC_st1510	97	CC97	2007	Northern Ireland	Northern Ireland
ERR134353	BSAC_st1515	22	CC22	2007	England	South-East
ERR134354	BSAC_st1520	20	unknown_CC	2007	England	South-East
ERR134355	BSAC_st1624	25	CC25	2007	Scotland	Scotland
ERR134356	BSAC_st1729	2274	CC22	2007	England	South-West
ERR134357	BSAC_st1815	5	CC5	2008	Ireland	Ireland
ERR134358	BSAC_st1854	25	CC25	2008	England	West Midlands
ERR134359	BSAC_st2045	15	CC15	2008	Scotland	Scotland
ERR134360	BSAC_st2053	30	CC30	2008	England	Central- East Midlands
ERR134334	BSAC_st326	5	CC5	2002	Wales	Wales
ERR134361	BSAC_st2193	25	CC25	2008	England	South-West
ERR134362	BSAC_st2349	22	CC22	2009	Northern Ireland	Northern Ireland
ERR134363	BSAC_st2374	1207	CC1	2009	England	South-West
ERR134364	BSAC_st2375	1207	CC1	2009	England	South-West
ERR134365	BSAC_st2572	22	CC22	2009	England	North-West 2
ERR134366	BSAC_st2574	22	CC22	2009	England	North-West 2
ERR134367	BSAC_st2575	2031	CC22	2009	England	North-West 2
ERR134368	BSAC_st2578	22	CC22	2009	England	North-West 2
ERR134369	BSAC_st2579	22	CC22	2009	England	North-West 2
ERR134370	BSAC_st2581	80	unknown_CC	2009	England	North-West 2
ERR134335	BSAC_st343	25	CC25	2002	England	North-West 1
ERR134371	BSAC_st2584	22	CC22	2009	England	North-West 2
ERR134372	BSAC_st2585	22	CC22	2009	England	North-West 2
ERR134373	BSAC_st2586	22	CC22	2009	England	North-West 2
ERR134374	BSAC_st2591	22	CC22	2009	England	North-East 1
ERR134375	BSAC_st2592	22	CC22	2009	England	North-East 1
ERR134378	BSAC_st2613	22	CC22	2009	England	West Midlands
ERR134379	BSAC_st2632	22	CC22	2009	England	South-Central
ERR134380	BSAC_st2639	22	CC22	2009	England	South-Central
ERR134381	BSAC_st2640	22	CC22	2009	England	South-Central
ERR134382	BSAC_st2649	36	CC30	2009	England	South-Central
ERR134383	BSAC_st2654	22	CC22	2009	England	South-East
ERR134384	BSAC_st2661	5	CC5	2009	England	South-East
ERR134385	BSAC_st2672	22	CC22	2009	England	North-Central
ERR134386	BSAC_st2674	22	CC22	2009	England	North-Central
ERR134387	BSAC_st2675	22	CC22	2009	England	North-Central
ERR134388	BSAC_st2679	22	CC22	2009	England	North-Central
ERR134389	BSAC_st2682	36	CC30	2009	England	North-Central
ERR134390	BSAC_st2686	22	CC22	2009	England	North-Central
ERR134337	BSAC_st424	45	CC45	2002	England	East 2
ERR134391	BSAC_st2691	22	CC22	2009	England	South-West
ERR134392	BSAC_st2713	22	CC22	2009	England	South-East
ERR134393	BSAC_st2727	22	CC22	2009	England	South-East
ERR134394	BSAC_st2729	22	CC22	2009	England	South-East
ERR134395	BSAC_st2731	22	CC22	2009	England	East 2
ERR134396	BSAC_st2733	22	CC22	2009	England	East 2
ERR134397	BSAC_st2756	22	CC22	2010	England	North-East 2
ERR134398	BSAC_st2759	22	CC22	2010	England	North-East 2
ERR134399	BSAC_st2761	149	CC5	2010	England	North-East 2
ERR134400	BSAC_st2767	22	CC22	2010	Northern Ireland	Northern Ireland
ERR134338	BSAC_st438	36	CC30	2002	England	Central- East Midlands
ERR134401	BSAC_st2768	22	CC22	2010	Northern Ireland	Northern Ireland
ERR134402	BSAC_st2773	8	CC8	2010	Northern Ireland	Northern Ireland
ERR134403	BSAC_st2784	22	CC22	2010	England	East 1
ERR134404	BSAC_st2785	2909	CC22	2010	England	East 1
ERR134405	BSAC_st2786	1	CC1	2010	England	East 1
ERR134406	BSAC_st2787	2894	CC22	2010	England	East 1
ERR134407	BSAC_st2788	36	CC30	2010	England	East 1
ERR134408	BSAC_st2793	22	CC22	2010	Wales	Wales
ERR134409	BSAC_st2797	36	CC30	2010	Wales	Wales
ERR134410	BSAC_st2801	5	CC5	2010	Wales	Wales
ERR134339	BSAC_st534	45	CC45	2003	Ireland	Ireland
ERR134411	BSAC_st2803	22	CC22	2010	Wales	Wales
ERR134412	BSAC_st2805	5	CC5	2010	Wales	Wales
ERR134416	BSAC_st1014s	22	CC22	2005	England	South-East
ERR134340	BSAC_st586	5	CC5	2003	Wales	Wales
ERR211890	BSAC_st830	22	CC22	2004	England	East 2
ERR211899	BSAC_st860	8	CC8	2004	Ireland	Ireland
ERR211900	BSAC_st865	22	CC22	2004	England	West Midlands
ERR211891	BSAC_st833	22	CC22	2004	Wales	Wales
ERR211892	BSAC_st838	22	CC22	2004	Wales	Wales
ERR211893	BSAC_st842	36	CC30	2004	England	North-West 1
ERR211894	BSAC_st845	22	CC22	2004	England	North-West 1
ERR211895	BSAC_st847	36	CC30	2004	England	North-West 1
ERR211896	BSAC_st848	22	CC22	2004	England	North-West 1
ERR211897	BSAC_st855	36	CC30	2004	Ireland	Ireland
ERR211898	BSAC_st856	22	CC22	2004	Ireland	Ireland
ERR223126	BSAC_st102	22	CC22	2001	Ireland	Ireland
ERR223127	BSAC_st103	22	CC22	2001	Ireland	Ireland
ERR223128	BSAC_st216	22	CC22	2001	England	South-Central
ERR223129	BSAC_st217	22	CC22	2001	England	South-Central
ERR223131	BSAC_st626	22	CC22	2003	Scotland	Scotland
ERR223132	BSAC_st630	22	CC22	2003	Scotland	Scotland
ERR223133	BSAC_st757	22	CC22	2004	Northern Ireland	Northern Ireland
ERR223134	BSAC_st759	22	CC22	2004	Northern Ireland	Northern Ireland
ERR223135	BSAC_st1108	22	CC22	2005	Ireland	Ireland
ERR223136	BSAC_st1110	22	CC22	2005	Ireland	Ireland
ERR223137	BSAC_st1229	22	CC22	2005	England	South-West
ERR223138	BSAC_st1230	2274	CC22	2005	England	South-West
ERR223139	BSAC_st1600	22	CC22	2007	England	North-West 1
ERR223140	BSAC_st1603	22	CC22	2007	Ireland	Ireland
ERR223141	BSAC_st1928	22	CC22	2008	Wales	Wales
ERR223142	BSAC_st1931	22	CC22	2008	England	North-West 1
ERR223143	BSAC_st2372	22	CC22	2009	England	South-West
ERR223144	BSAC_st2376	22	CC22	2009	England	South-West
ERR223145	BSAC_st2593	22	CC22	2009	England	North-East 1
ERR223146	BSAC_st2604	22	CC22	2009	England	North-East 1
ERR223147	BSAC_st2949	22	CC22	2010	Scotland	Scotland
ERR223148	BSAC_st2952	22	CC22	2010	Scotland	Scotland
